# Supplementary material for: A-Kinase Anchoring Protein 79/150 Scaffolds Transient Receptor Potential A 1 Phosphorylation and Sensitization by Metabotropic Glutamate Receptor Activation
Source: PubMed Central journal article supplement (PMC5431798; doi:10.1038/s41598-017-01999-4), 2017-05-12
Supplement: 41598_2017_1999_MOESM1_ESM.pdf [file 41598_2017_1999_MOESM1_ESM.pdf]

A-Kinase Anchoring Protein 79/150 Scaffolds Transient Receptor Potential A 1  
Phosphorylation and Sensitization by Metabotropic Glutamate Receptor Activation

Allison Doyle Brackley<sup>1</sup>, Ruben Gomez<sup>2</sup>, Kristi A. Guerrero<sup>2</sup>, Armen N. Akopian<sup>3</sup>,  
Marc J. Glucksman<sup>4</sup>, Junhui Du<sup>4</sup>, Susan M. Carlton<sup>5</sup>, Nathaniel A. Jeske<sup>1, 2, 6</sup>

**Supplementary Figure 1**

|      |            |            |            |               |            |
|------|------------|------------|------------|---------------|------------|
| 1    | MKRSLRRVLR | PEERKEVQGV | VYRGVGDMD  | CSKESFKVDI    | EGDMCRLEAF |
| 51   | IKNRRKLSKY | EDENLCLLHH | AAAEGQVELM | QLIINGSSCE    | ALNVMDYGN  |
| 101  | TPLHWAAEKN | QVESVKFLLS | QGPNPLNRNR | NMMAPLHIAV    | QGMVNEVIKV |
| 151  | LTEHKATNIN | LEGENGNTAL | MSTCAKDNSE | ALQILLEKGA    | KLCKSNKWGD |
| 201  | YPVHQAAFSG | AKRCMELILA | YGEKTGYSRE | AHINRVNHKK    | ASPLHLAVQS |
| 251  | GDLDMIKMCL | DSGAHIDMME | NAKCMALHFA | ATQGATDIVK    | LMISSYTGSS |
| 301  | DIVNAVDGNQ | ETLLHRASLF | DHDLADYLI  | SVGADINSTD    | SEGRSPLILA |
| 351  | TASASWNIVN | LLLSKGAKVD | IKDHLGRNFL | HLTVQQPYGL    | RNLRPEFLQM |
| 401  | QHIKELVMDE | DNDGCTPLHY | ACRQGAPVSV | NNLLRFNVSV    | HSKSKDKKSP |
| 451  | LHFAASYGRI | NTCQRLQDI  | SDTRLNEG   | LHGMPHLA      | AKNGHDKVVQ |
| 501  | LLLKKGALFL | SDHNGWTALH | HASMGGYTQT | MKVILDTNLK    | CTDRLDEEGN |
| 551  | TALHFAAREG | HAKAVAMLLS | YNADILLNKK | QASFLHIALH    | NKRKEVLT   |
| 601  | IRSKRWDECL | QVFTHDSPSN | RCPIMEMVEY | LPECMKVLLD    | FCMIPSTEDK |
| 651  | SCQDYHIEYN | FKYLQCPLSM | TKKVTPQDV  | IYEPLTILNV    | MVQHNRIELL |
| 701  | NHPVCREYLL | MKWCAYGFR  | HMMNLGSYCL | GLIPMTLLV     | KIQPGMAFNS |
| 751  | TGIINETIST | HEERINTLNS | FPLKICMILV | FLSSIFGYCK    | EVVQIFQQR  |
| 801  | NYFLDYNNAL | EWVIYTTSMI | FVLPLFLDIP | AYMQWQCGAI    | AIFFYWMNFL |
| 851  | LYLQRFENCG | IFIVMLEVIF | KTLLRSTGVF | IFLLAFGLS     | FYVLLNFQDA |
| 901  | FSTPLLSLIQ | TFSMMLGDIN | YRDAFLEPLF | RNELAYPVL     | FGQLIAFTMF |
| 951  | VPIVLMNLLI | GLAVGDIAEV | QKHASLKR   | IA MQVELHTNLE | KKLPFWYLRK |
| 1001 | VDQRSTIVYP | NRPRHGRMLR | FFHYFLSMQE | TRQEAPNIDT    | CLEMEILKQK |
| 1051 | YRLKDLTSL  | EKQHELIKLI | IQKMEISET  | EDEDNHCSFQ    | DRFKKERLEQ |
| 1101 | MHSKWNFVLN | AVKTKTHCSI | SHPDI      |               |            |

**Supplementary Figure 1. TRPA1 Antibody Verification.** Rat TRPA1 sequence is indicated, with thirteen tryptic fragments sequenced by mass spectroscopic analyses (in yellow) of immunoprecipitated TRPA1.
